# Supplementary material for: Evaluation of the Impacts of Land Use in Water Quality and the Role of Nature-Based Solutions: A Citizen Science-Based Study
Source: MDPI journal article supplement (doi:10.3390/su131910519), 2021-09-22
Supplement: s1 [file s1]

## SI.1. Agricultural Cycles in the Amanalco-Valle de Bravo Basin

Table S1. Agricultural cycle of maize, fava bean, and potato.

|                        | January | February | March | April | May | June | July | August | September | October | November | December |
|------------------------|---------|----------|-------|-------|-----|------|------|--------|-----------|---------|----------|----------|
| Cleaning of the field  |         |          |       |       |     |      |      |        |           |         |          |          |
| Soil disinfection      |         |          |       |       |     |      |      |        |           |         |          |          |
| Seed disinfection      |         |          |       |       |     |      |      |        |           |         |          |          |
| Tilling                |         |          |       |       |     |      |      |        |           |         |          |          |
| Planting               |         |          |       |       |     |      |      |        |           |         |          |          |
| Weeding                |         |          |       |       |     |      |      |        |           |         |          |          |
| Second weeding         |         |          |       |       |     |      |      |        |           |         |          |          |
| Irrigation             |         |          |       |       |     |      |      |        |           |         |          |          |
| Fertilizer application |         |          |       |       |     |      |      |        |           |         |          |          |
| Herbicide application  |         |          |       |       |     |      |      |        |           |         |          |          |
| Pesticide application  |         |          |       |       |     |      |      |        |           |         |          |          |
| Fungicide application  |         |          |       |       |     |      |      |        |           |         |          |          |
| Adherent application   |         |          |       |       |     |      |      |        |           |         |          |          |
| Foliage drying         |         |          |       |       |     |      |      |        |           |         |          |          |
| Harvesting             |         |          |       |       |     |      |      |        |           |         |          |          |

Note: Maize activities are highlighted in pink; fava bean activities are highlighted in green; and potato activities are highlighted in brown [1]. Tilling is reported during the months of March and April, right before the rainy season starts. Fertilizer, herbicide, pesticide, and adherent application are reported to be done also during rainy season.

## SI. 2. Agricultural Inputs Reported for Each Crop in the Amanalco-Valle de Bravo basin

Table S2. Agricultural inputs reported for each crop [1].

| Crop.     | Activity     | Product          | Quantity/ha | Unit      |
|-----------|--------------|------------------|-------------|-----------|
| Maize     | Fertilizing  | Urea             | 350         | Kilograms |
|           |              | Dap (18–46)      | 250         | Kilograms |
|           |              | Ammonium sulfate | 300         | Kilograms |
|           |              | Phosphonitrate   | 200         | Kilograms |
|           | Weed control | Finale           | 2           | Liters    |
|           |              | Hierbamina       | 2           | Liters    |
|           | Pest control | Lorsban 480      | 1           | Liters    |
| Fava bean | Fertilizing  | Manure           | 3           | Tons      |
|           |              | Dap (18–46)      | 500         | Kilograms |

|        |                       |                 |     |           |
|--------|-----------------------|-----------------|-----|-----------|
| Potato | Weed control          | Di nitro        | 10  | Kilograms |
|        | Pest control          | Malation        | 4   | Liters    |
|        |                       | Pirimar (50 ph) | 2   | Kilograms |
|        | Disease control       | Cupracit        | 4   | Kilograms |
|        |                       | Manzate         | 4   | Kilograms |
|        | Seed disinfection     | Furadan-captan  | 10  | Kilograms |
|        | Soil disinfection     | Cecobin         | 1   | Liters    |
|        |                       | Monserel        | 4   | Liters    |
|        |                       | Pruxor          | 2   | Liters    |
|        |                       | Furadan         | 2   | Liters    |
|        |                       | Smart trac      | 1   | Liters    |
|        |                       | Miciosoil       | 2   | Liters    |
|        |                       | Dupont venir    | 1   | Liters    |
|        | Fertilizing           | Potato mix      | 2   | Tons      |
|        | Emergency fertilizing | Potato mix      | 1   | Tons      |
|        | Pest control          | Tuner           | 4   | Liters    |
|        |                       | Morenta         | 4   | Liters    |
|        |                       | Muralla         | 4   | Liters    |
|        |                       | Hero            | 8   | Liters    |
|        | Weed control          | Cencor          | 4   | Liters    |
|        | Fungi control         | Ridomil         | 1.2 | Liters    |
|        |                       | Curzate         | 2   | Kilograms |
|        | Fertilizing           | Nutriphite      | 32  | Liters    |
|        | Adherent              | Band            | 16  | Liters    |
|        | Foliage drying        | Paraqvat        | 8   | Liters    |

Note: This table shows the type and quantity of agricultural inputs reported by peasants in the Amanalco-Valle de Bravo basin by crop type. It can be seen how peasants reported using 7 different types of inputs for maize and fava bean, while for potato, they reported using 20 different agricultural inputs.

## Reference

1. Consejo Civil Mexicano para la Silvicultura Sostenible; Earthwatch Institute; HSBC. *Impacto de las aguas residuales y las prácticas agrícolas de los cultivos de maíz, haba y papa sobre la calidad del agua en la cuenca Amanalco-Valle de Bravo*; 2018;
